# Supplementary figures and images for: Development of High-Density Genetic Linkage Maps and Identification of Loci for Chestnut Gall Wasp Resistance in Castanea spp
Source: MDPI journal article supplement (doi:10.3390/plants9081048), 2020-08-18

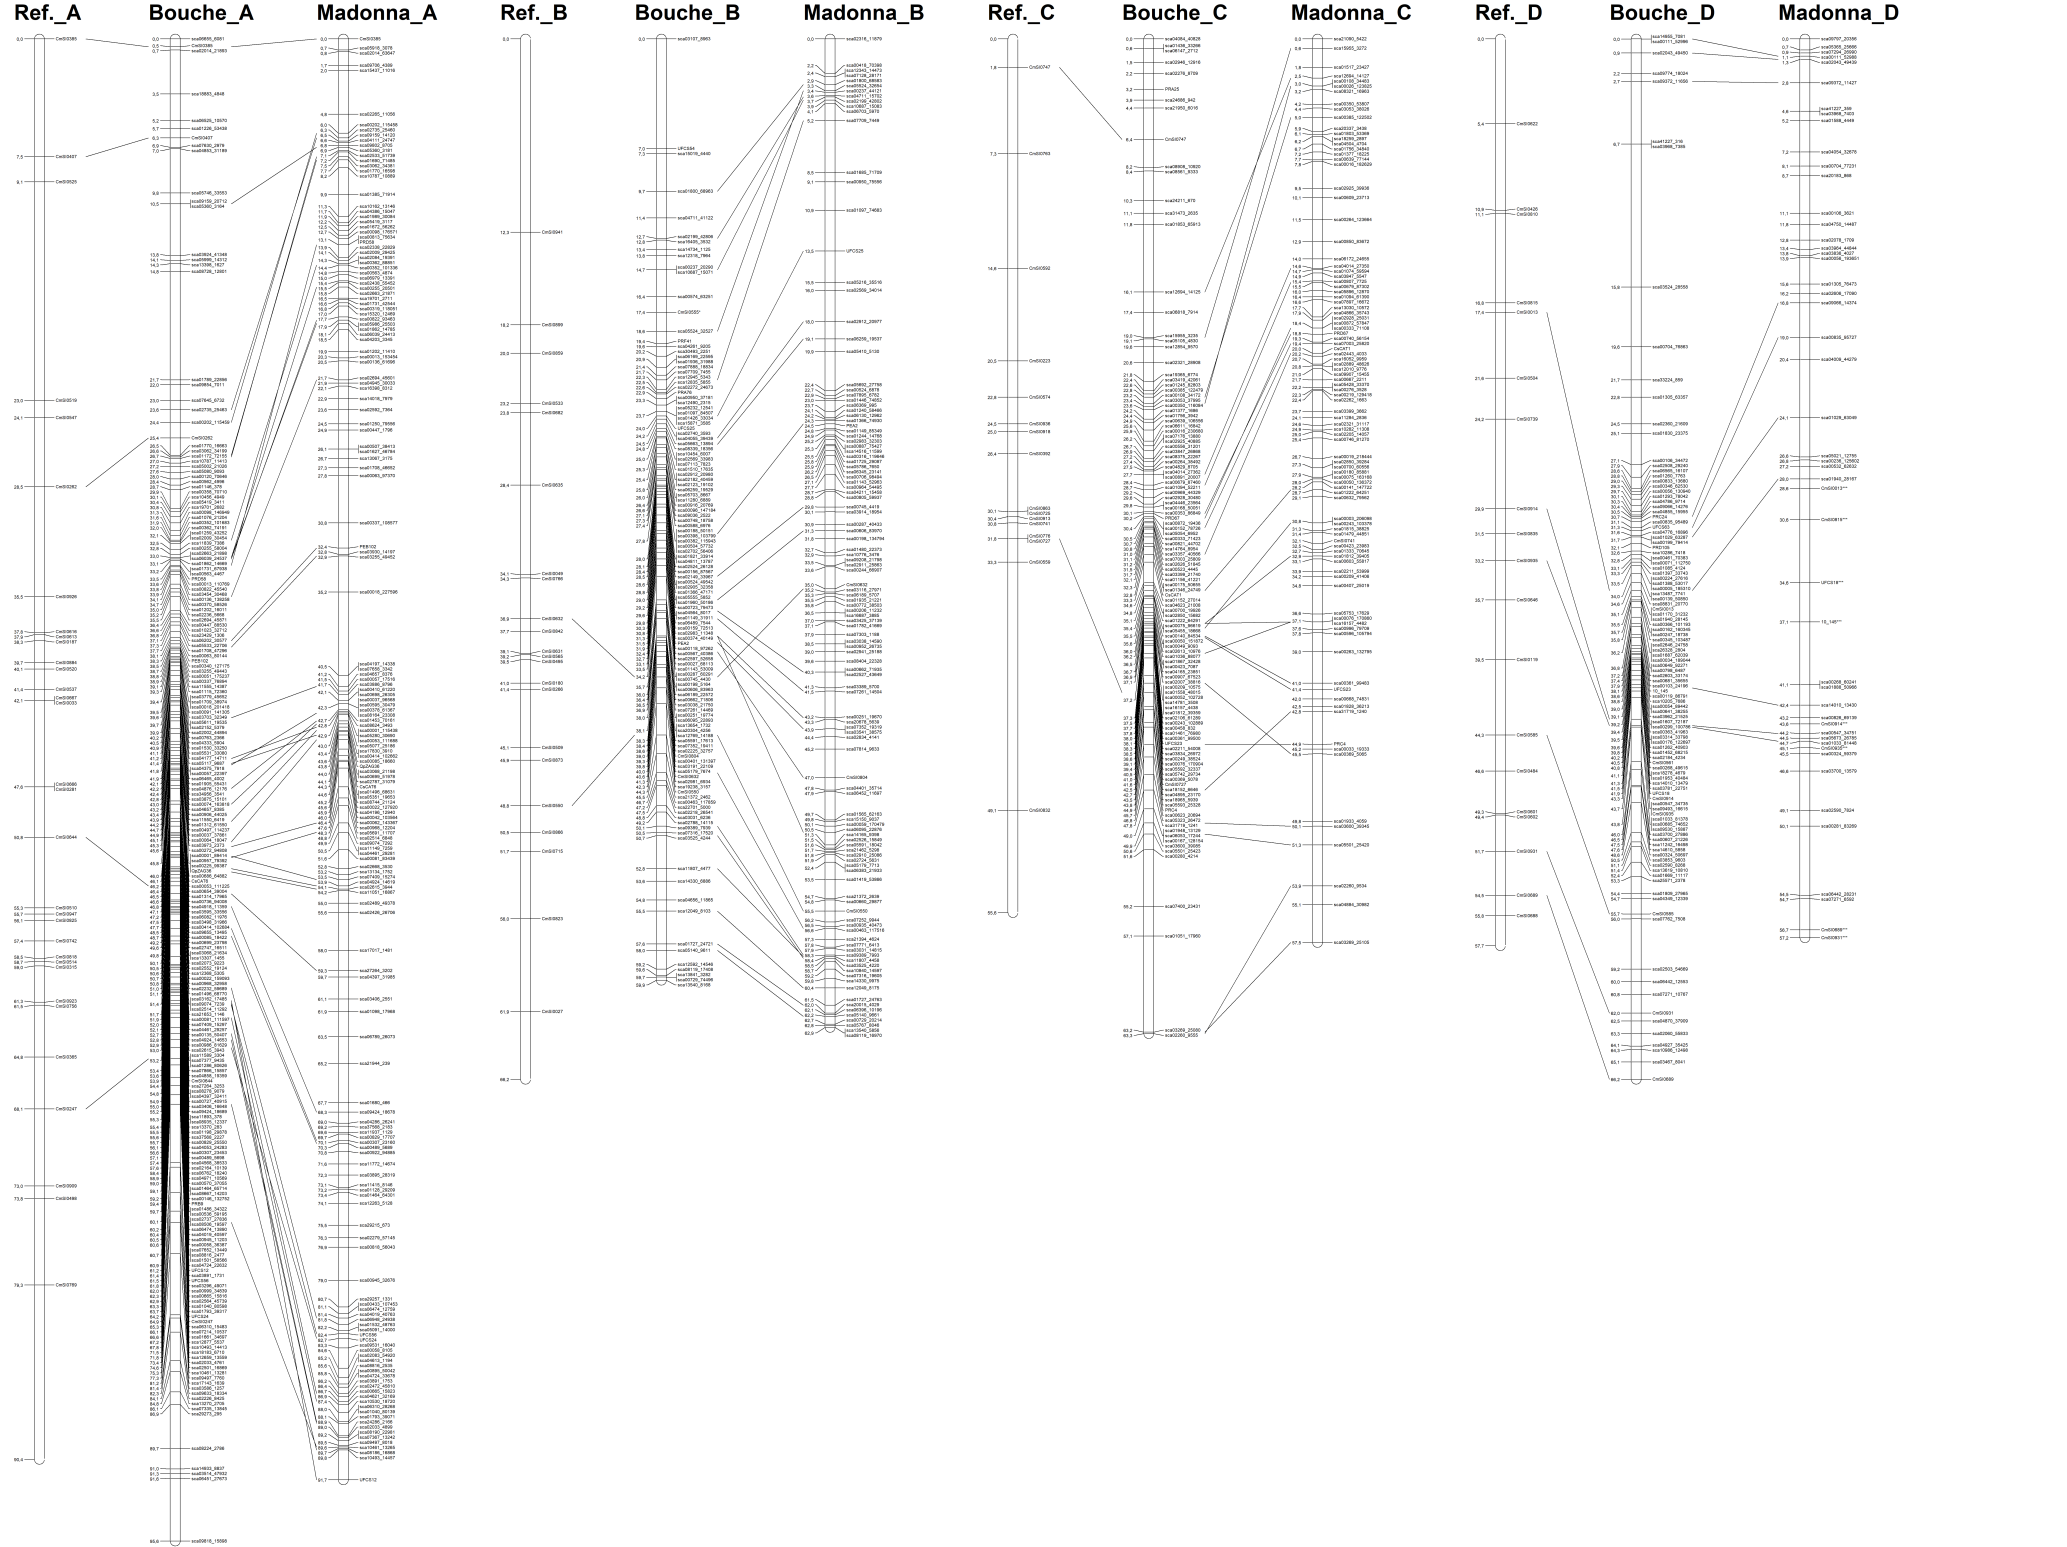

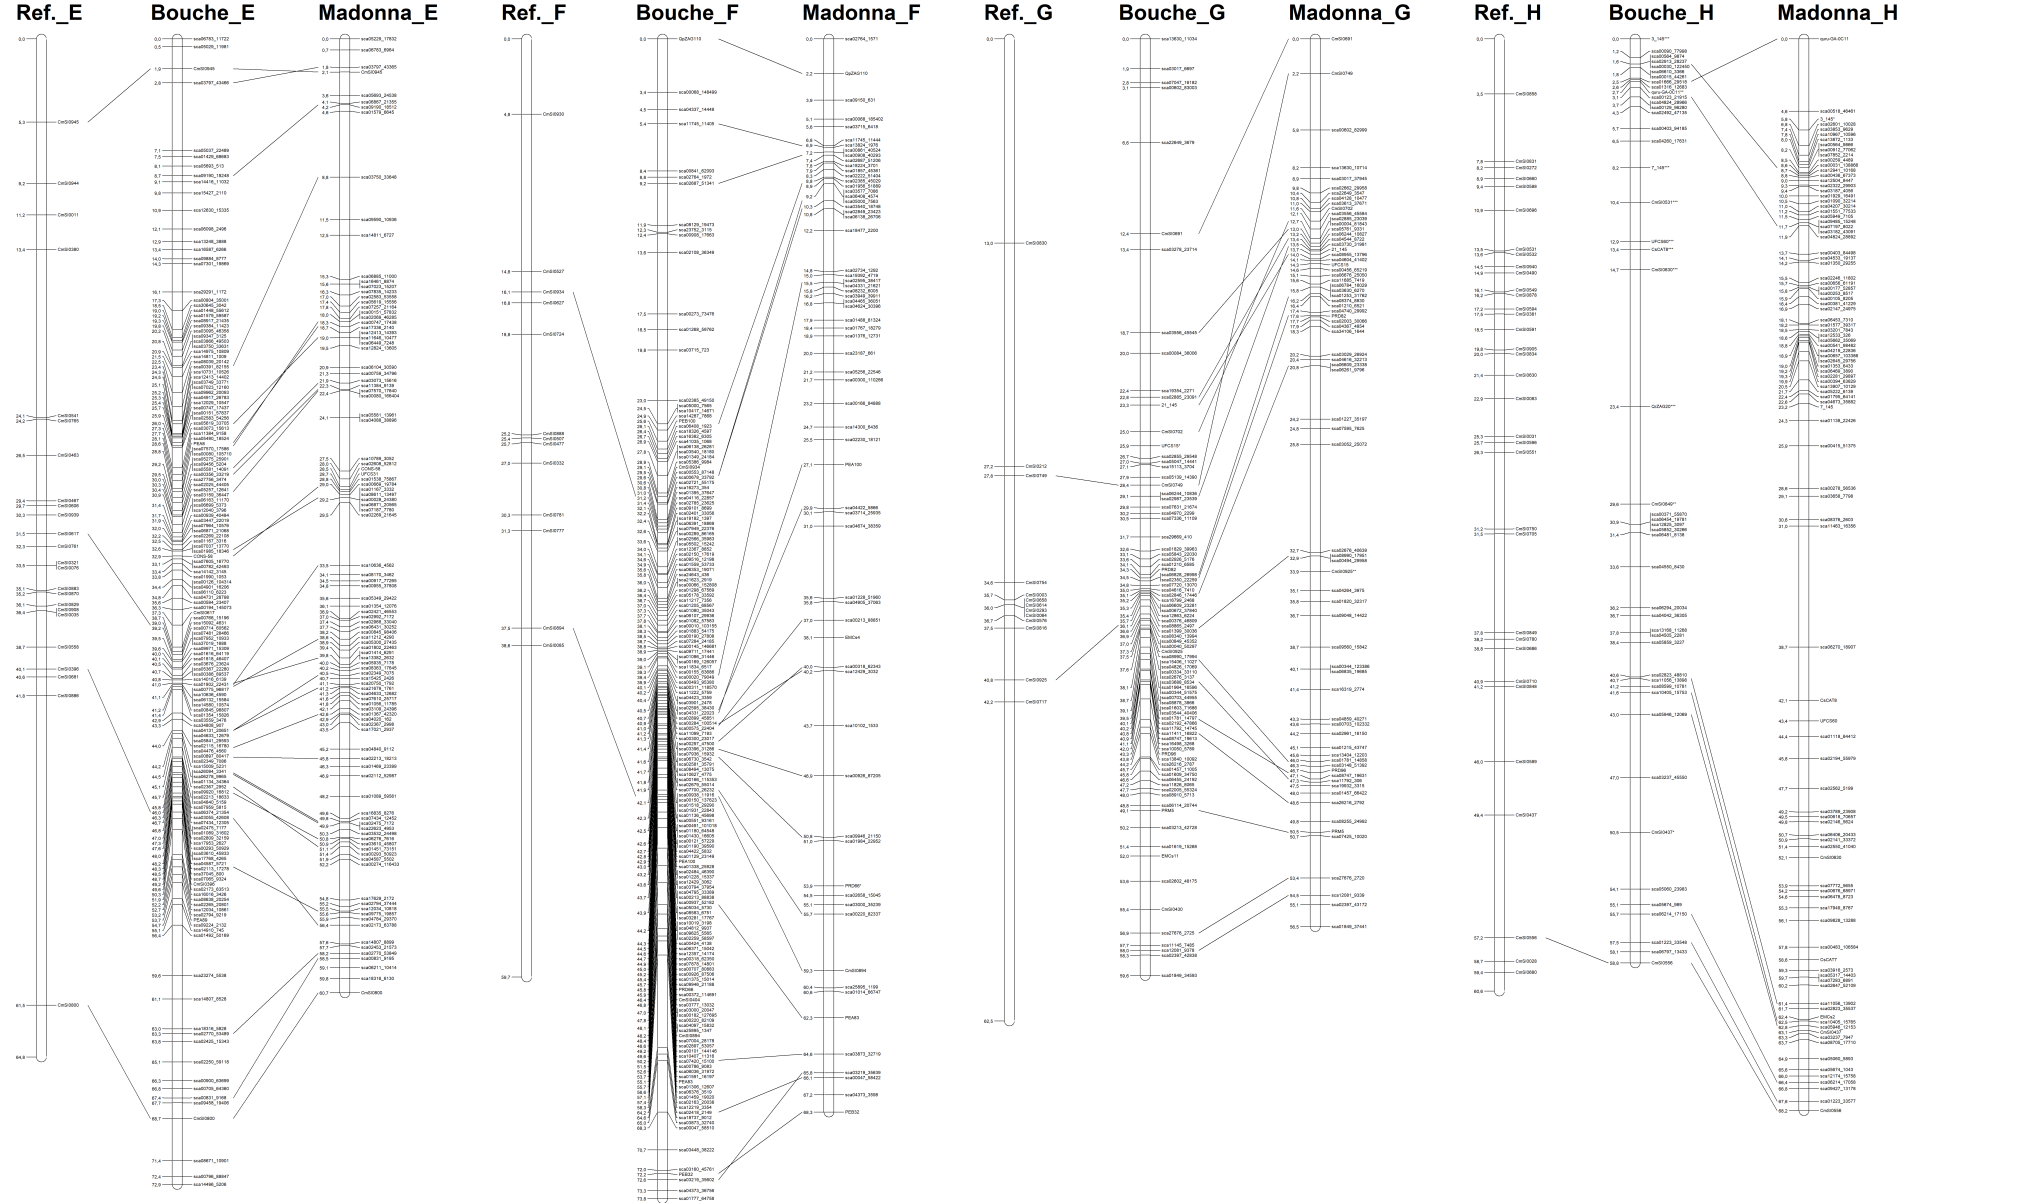

Supplement: s1 [file s1]
